# Supplementary material
Source: Springer Nature journal article supplement (https://www.springermedizin.de/resource/supplementary/12967_2013_1727_MOESM8_ESM.pdf/9575140)

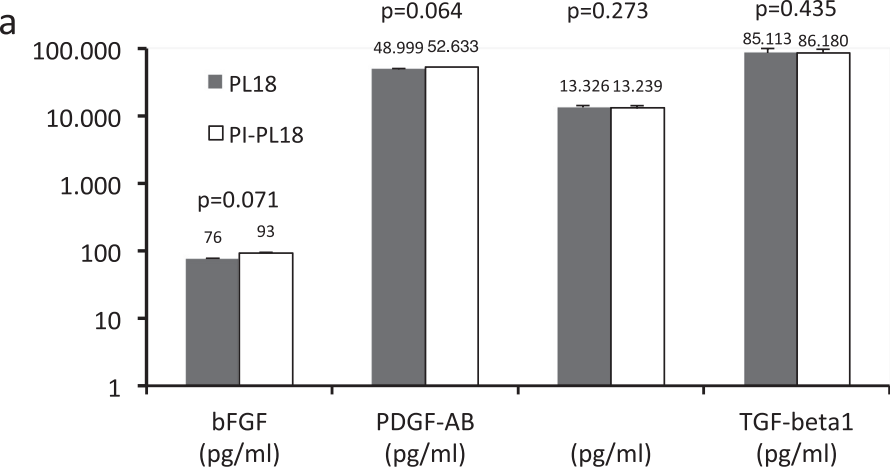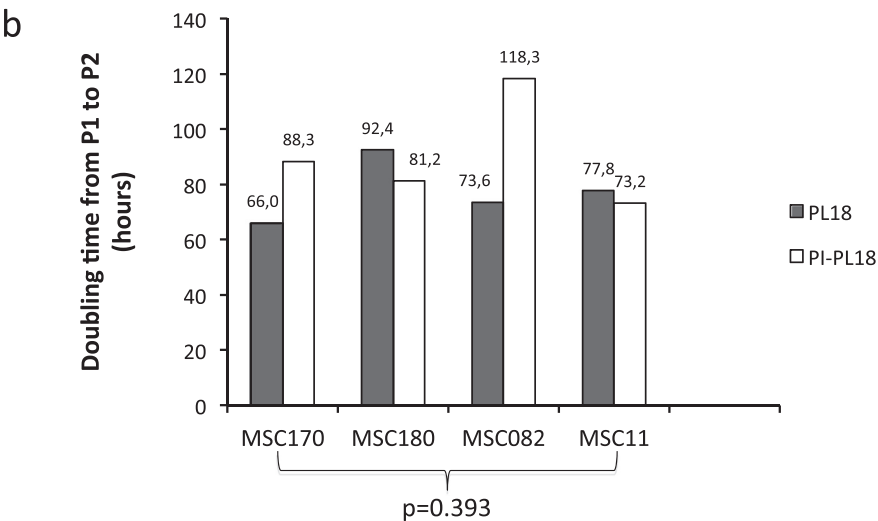

Supplement: MOESM8 [file 9575140]
